# Supplementary material for: Characterizing the structure and properties of dry and wet polyethylene glycol using multi-scale simulations
Source: Royal Society of Chemistry journal article supplement (doi:10.1039/c8cp01802b), 2018-01-01
Supplement: c8cp01802b1.pdf [file c8cp01802b1.pdf]

# Supplementary Information

for

Characterizing structure and properties of dry and wet polyethylene glycol using  
multi-scale simulations

Gokhan KACAR\*

*Department of Genetics and Bioengineering, Faculty of Engineering, Trakya University,  
22030, Edirne, Turkey*

\* E-mail: [gokhankacar@trakya.edu.tr](mailto:gokhankacar@trakya.edu.tr)

The functional forms in order to compute the DPD interaction parameters are given in the main manuscript. In Table S1, we tabulate the Flory-Huggins parameters, dimensionless number densities and the computed DPD interaction parameters. These values, together with the physical length scale of DPD are used to compute the pair-wise interaction parameters. The physical DPD length scales correspond to 6.62 Å and 5.75 Å, respectively for dry and wet PEG, which are computed by employing the average volume computation as detailed in reference <sup>1</sup>. Therefore, there are two sets of DPD interaction parameters (dry PEG in Table S1 and wet PEG in Table S2) as a result of the different physical length scales of DPD for the dry and wet conditions. In DPD, the magnitude of the repulsion is dependent on the value of the  $\chi_{ij}$  parameter rather than the DPD parameter itself. For a more detailed information, the reader is referred to our previous work on the DPD parameterization <sup>2</sup>.

A harmonic bond potential is set for the bonded interactions of H-L, L-L and L-K. The spring constant is set as  $50 kT/r_{DPD}^2$  and the bond lengths are set to  $0.50 r_{DPD}$ . Angle potential contribution is neglected in the DPD simulations.

**Table S1.** Computed Flory-Huggins parameters  $\chi_{ij}$  and the pairwise DPD interaction parameters  $a_{ij}$  of the coarse-grained beads of dry PEG. Values in parentheses indicate the solubility parameters  $\delta_i$  in dimensions  $(J/cm^3)^{0.5}$  and the dimensionless number densities of beads  $\rho_i$  obtained by  $\rho_i = \rho_{i,liquid}/M_{W,i}$  in rows and columns, respectively.

| $\chi_{ij}$                       | L (or H)<br>( $\delta_i = 25.09$ ) | K<br>( $\delta_i = 31.86$ ) |
|-----------------------------------|------------------------------------|-----------------------------|
| $a_{ij}$                          |                                    |                             |
| L (or H)<br>( $\rho_i = 0.0103$ ) | 0.00                               | 1.12                        |
| K<br>( $\rho_i = 0.0112$ )        | 25.10                              | 0.00                        |
|                                   | 27.14                              | 20.89                       |

**Table S2.** Computed Flory-Huggins parameters  $\chi_{ij}$  and the pairwise DPD interaction parameters  $a_{ij}$  of the coarse-grained beads of wet PEG. Values in parentheses indicate the solubility parameters  $\delta_i$  in dimensions  $(\text{J}/\text{cm}^3)^{0.5}$  and the dimensionless number densities of beads  $\rho_i$  obtained by  $\rho_i = \rho_{i,\text{liquid}}/M_{W,i}$ , in rows and columns, respectively.

| $\chi_{ij}$                              | <b>L (or H)</b><br>( $\delta_i = 25.09$ ) | <b>K</b><br>( $\delta_i = 31.86$ ) | <b>W</b><br>( $\delta_i = 47.00$ ) |
|------------------------------------------|-------------------------------------------|------------------------------------|------------------------------------|
| $a_{ij}$                                 |                                           |                                    |                                    |
| <b>L (or H)</b><br>( $\rho_i = 0.0103$ ) | 0.00                                      | 1.12                               | 11.79                              |
| <b>K</b><br>( $\rho_i = 0.0112$ )        | 61.21                                     | 0.00                               | 5.63                               |
| <b>W</b><br>( $\rho_i = 0.0334$ )        | 57.69                                     | 51.15                              | 0.00                               |
|                                          | 44.91                                     | 29.93                              | 4.76                               |

The hydrogen bonds are modeled between PEG beads and water bead with the Morse potential. The Morse potential parameters used in the simulations are taken from a previous work for the corresponding molar fraction of PEG beads <sup>3</sup> ( $x_{\text{PEG}} = 0.50$ ) and tabulated in Table S3.

**Table S3.** Hydrogen bond interaction  $D_0$  and the hydrogen bond equilibrium distance  $r_0$  values used in the DPD simulations.

| Morse parameters       | <b>L</b> | <b>H</b> | <b>K</b> |
|------------------------|----------|----------|----------|
| $D_0 [k_B T]$          | 10.91    | 7.76     | 8.82     |
| $r_0 [r_{\text{DPD}}]$ | 0.84     | 0.84     | 0.84     |

## References

1. G. Kacar, E. A. J. F. Peters and G. de With, *Soft Matter*, 2013, **9**, 5785-5793.
2. G. Kacar, E. A. J. F. Peters and G. de With, *Epl-Europhys Lett*, 2013, **102**.
3. G. Kacar, *Chemical Physics Letters*, 2017, **690**, 133-139.
